# Supplementary material
Source: Springer Nature journal article supplement (https://www.springermedizin.de/resource/supplementary/13075_2013_3994_MOESM1_ESM.pdf/9695880)

**a**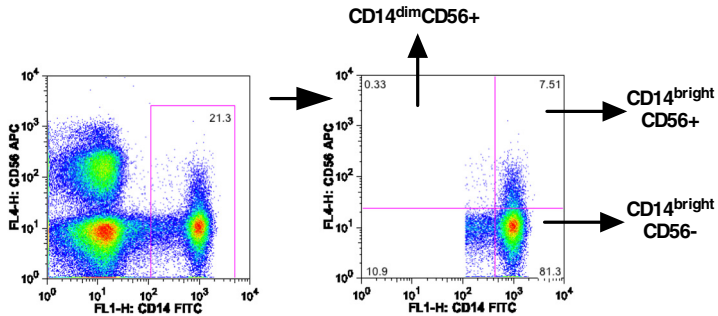**b**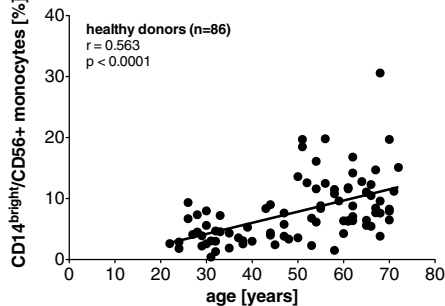**c**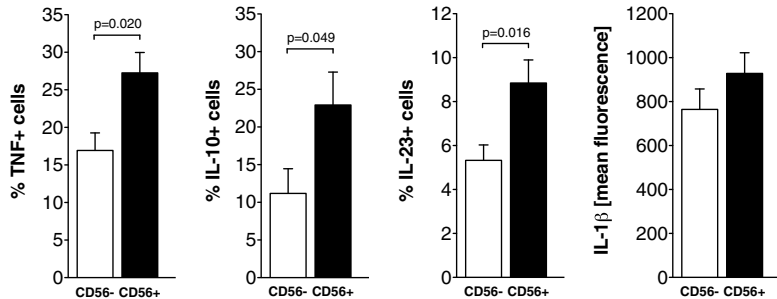**d**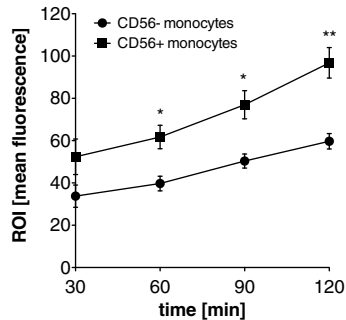

Supplement: MOESM1 [file 9695880]
